# Supplementary material for: Unveiling the Influence of Carbon Nanotube Diameter and Surface Modification on the Anchorage of L-Asparaginase
Source: MDPI journal article supplement (doi:10.3390/app12178924), 2022-09-05
Supplement: s1 [file s1]

Archive with 1 entries (1 files):
- applsci-1859970-supplementary.pdf
